# Supplementary material for: Rhein Suppresses Colorectal Cancer Cell Growth by Inhibiting the mTOR Pathway In Vitro and In Vivo
Source: MDPI journal article supplement (doi:10.3390/cancers13092176), 2021-04-30

Figure 2G

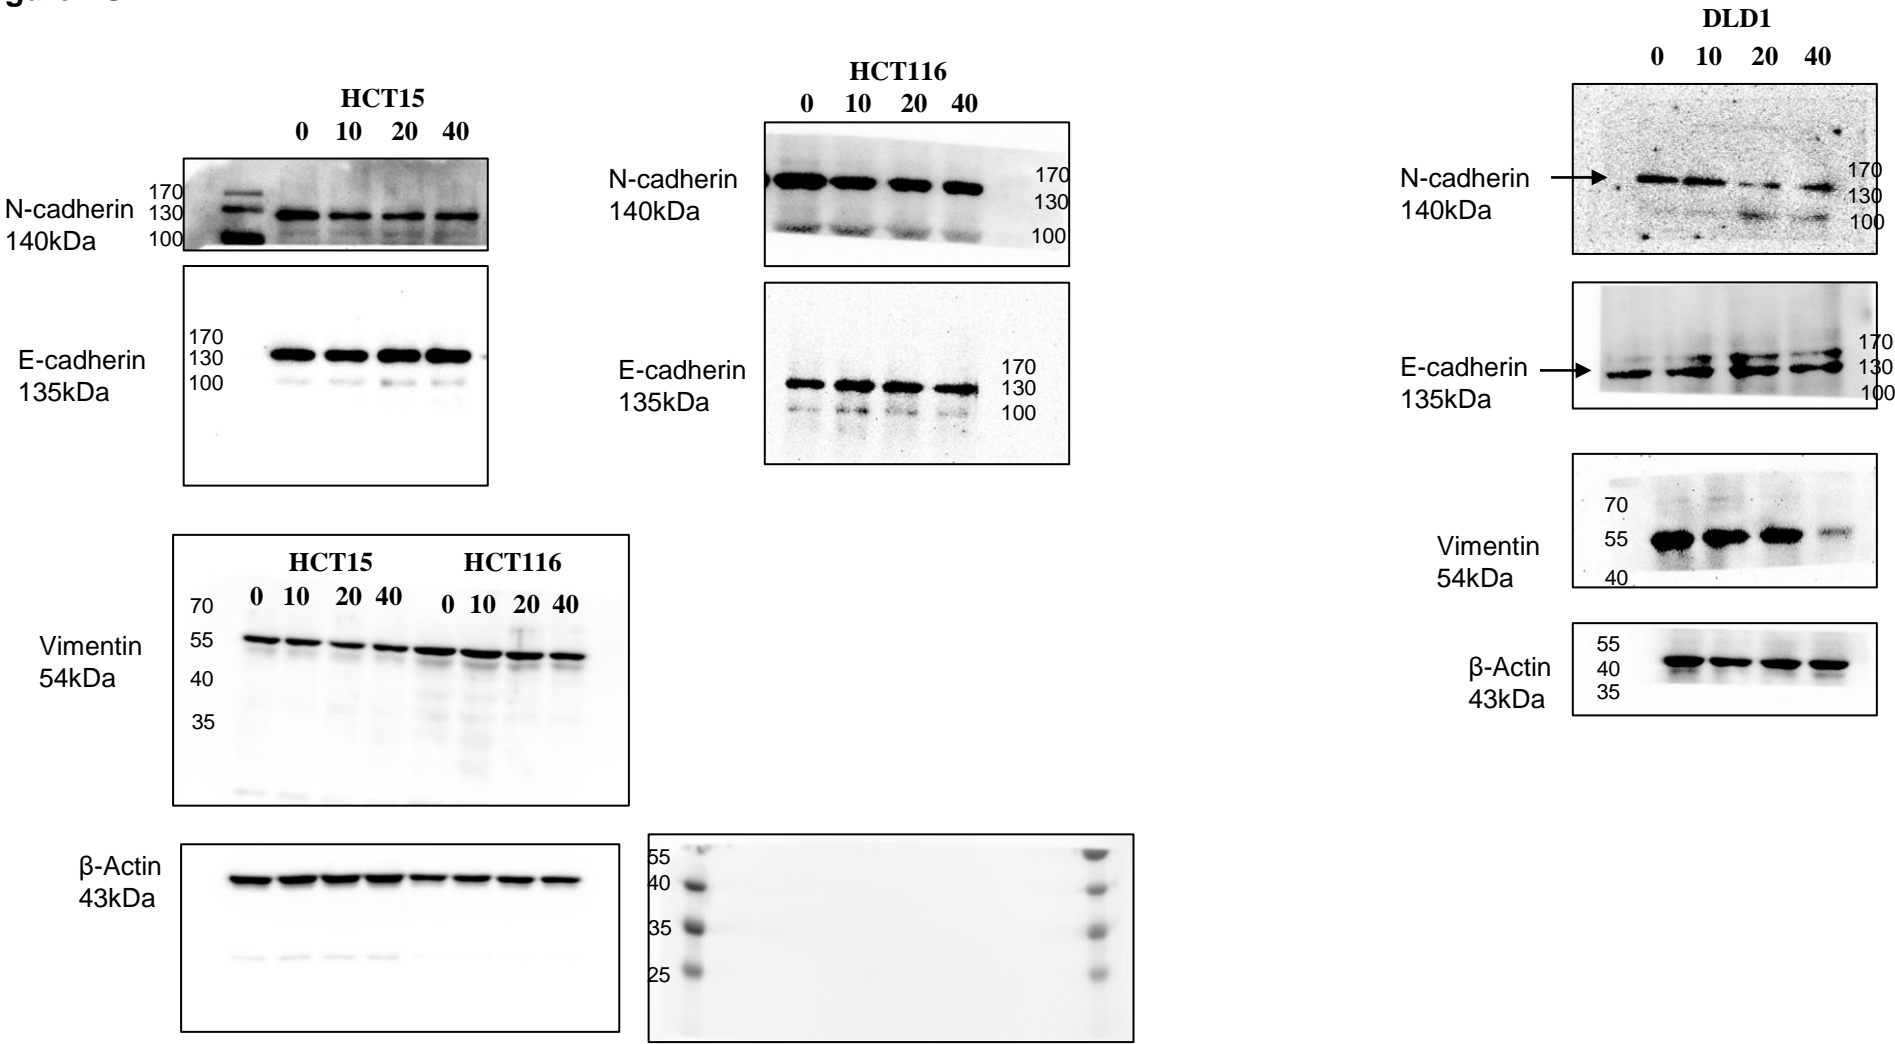

Figure 3C

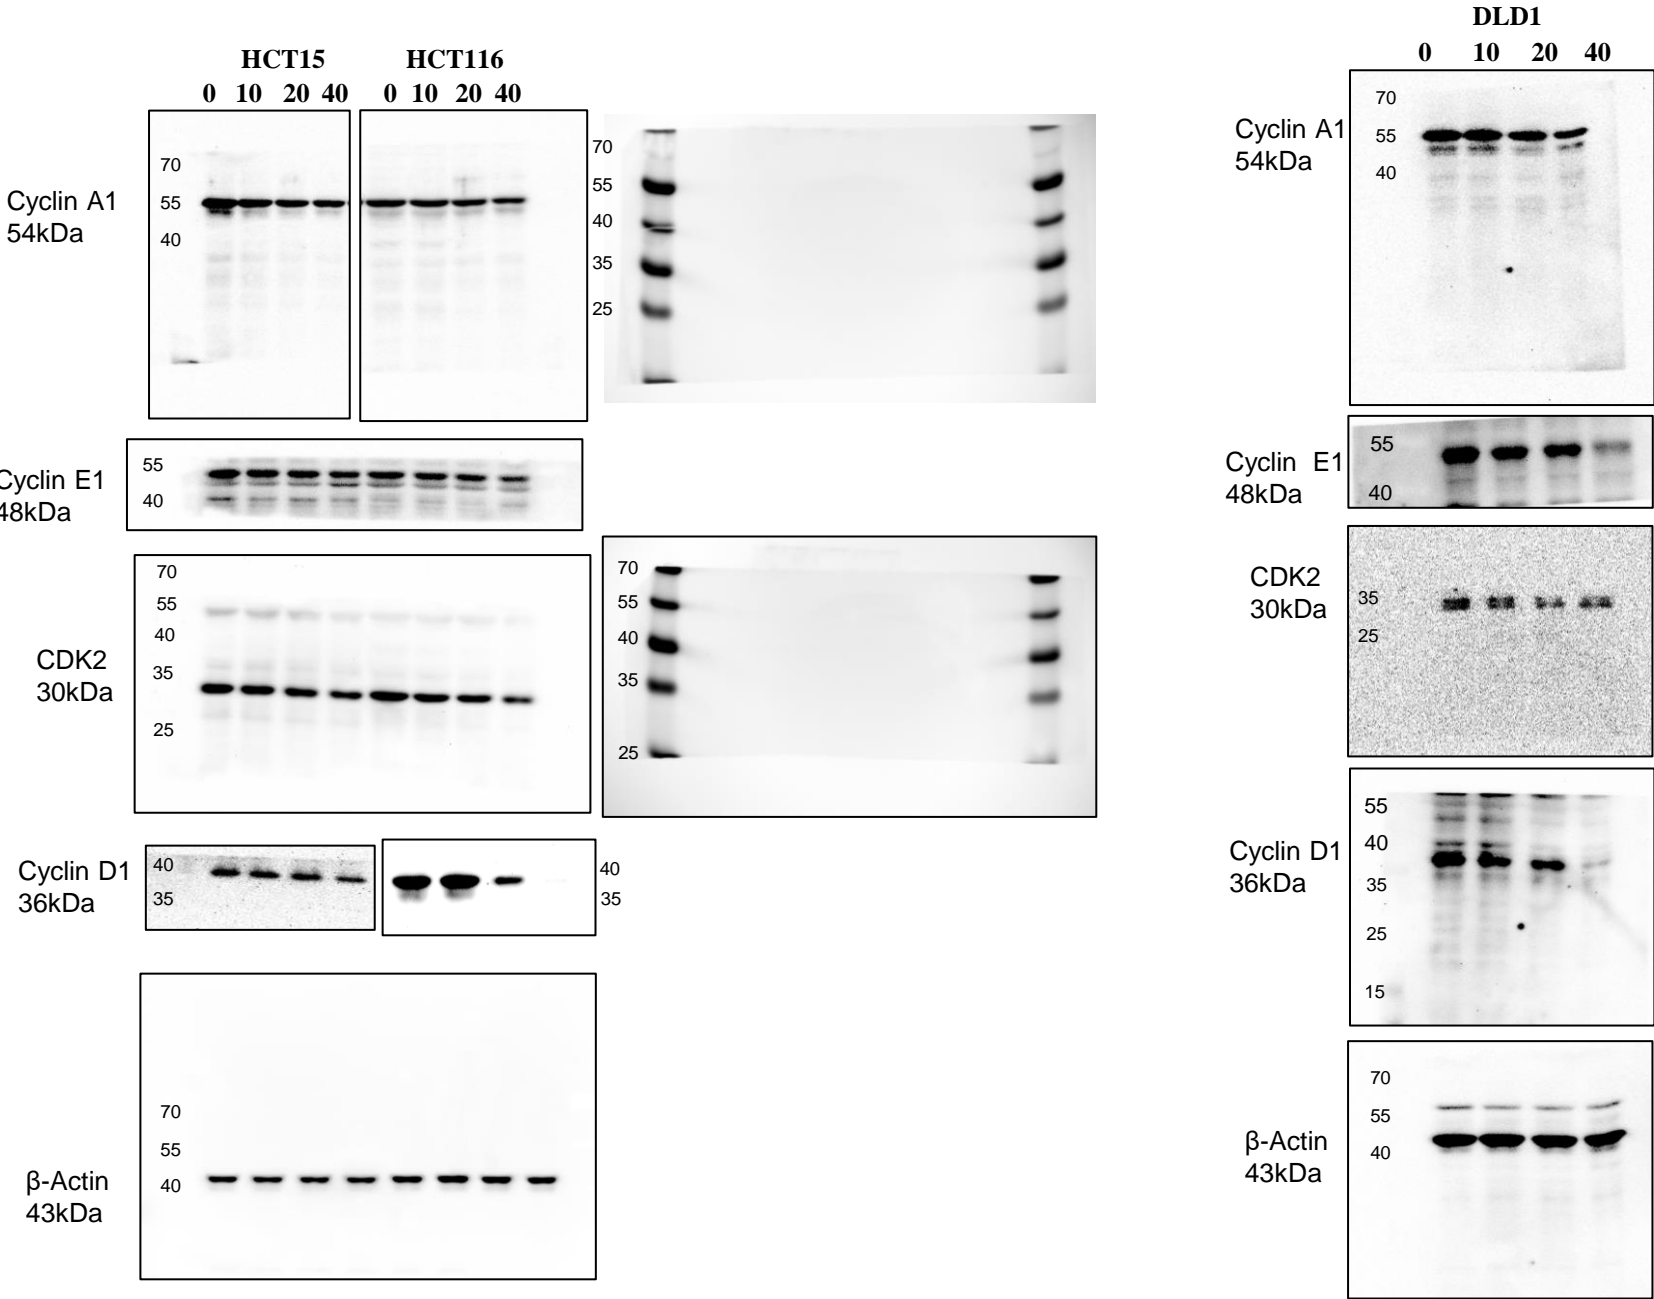

Figure 3F

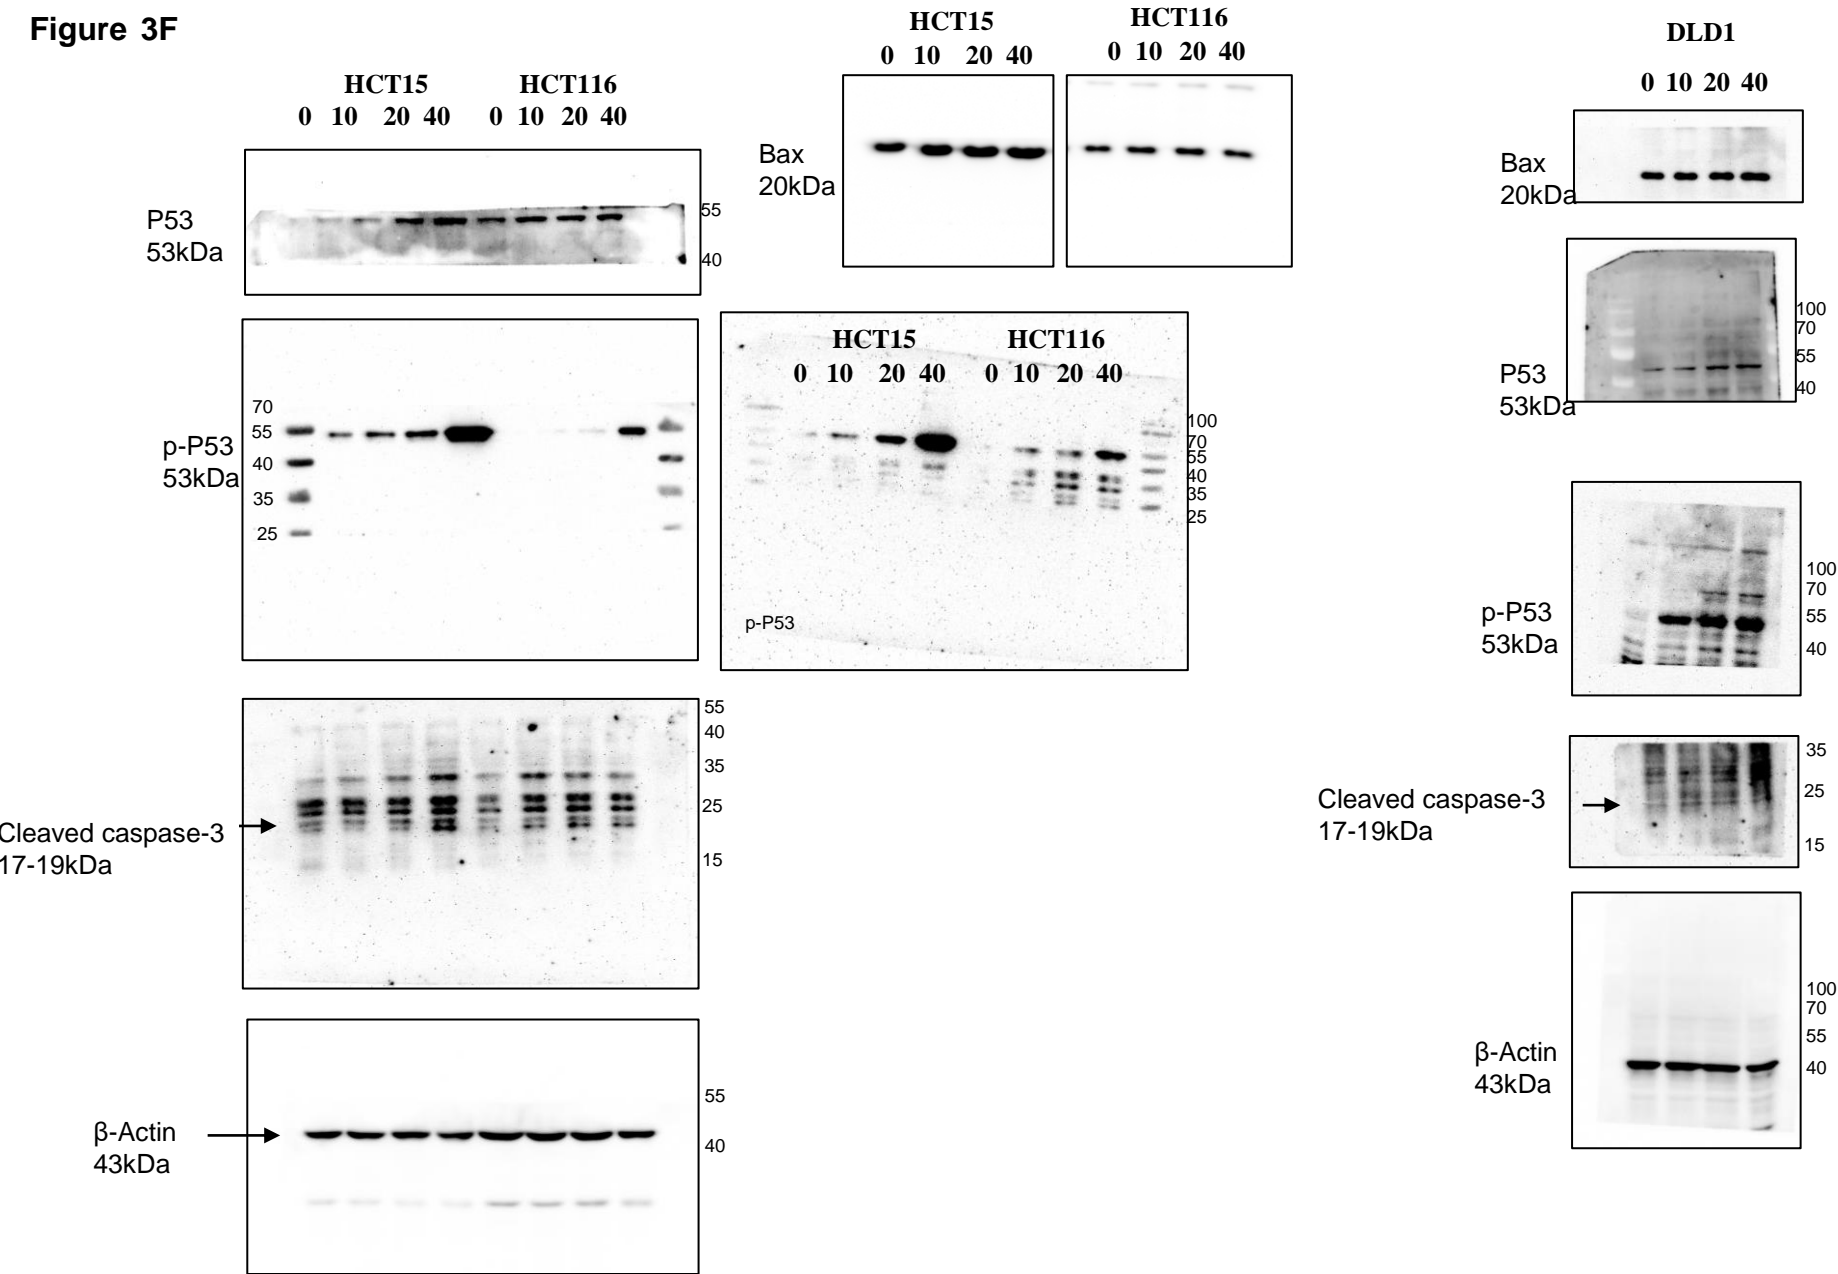

Figure 4B

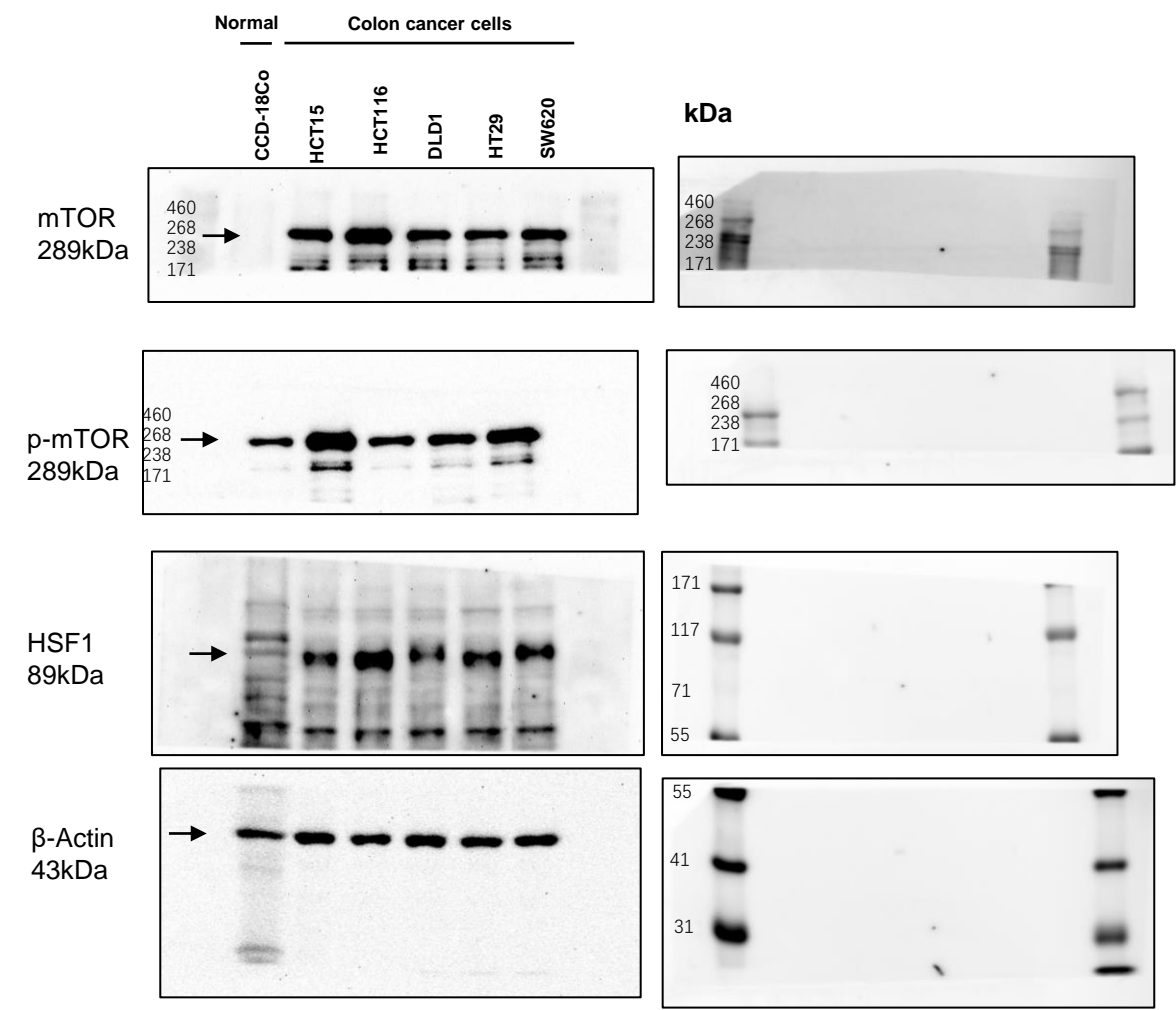

Figure 4C

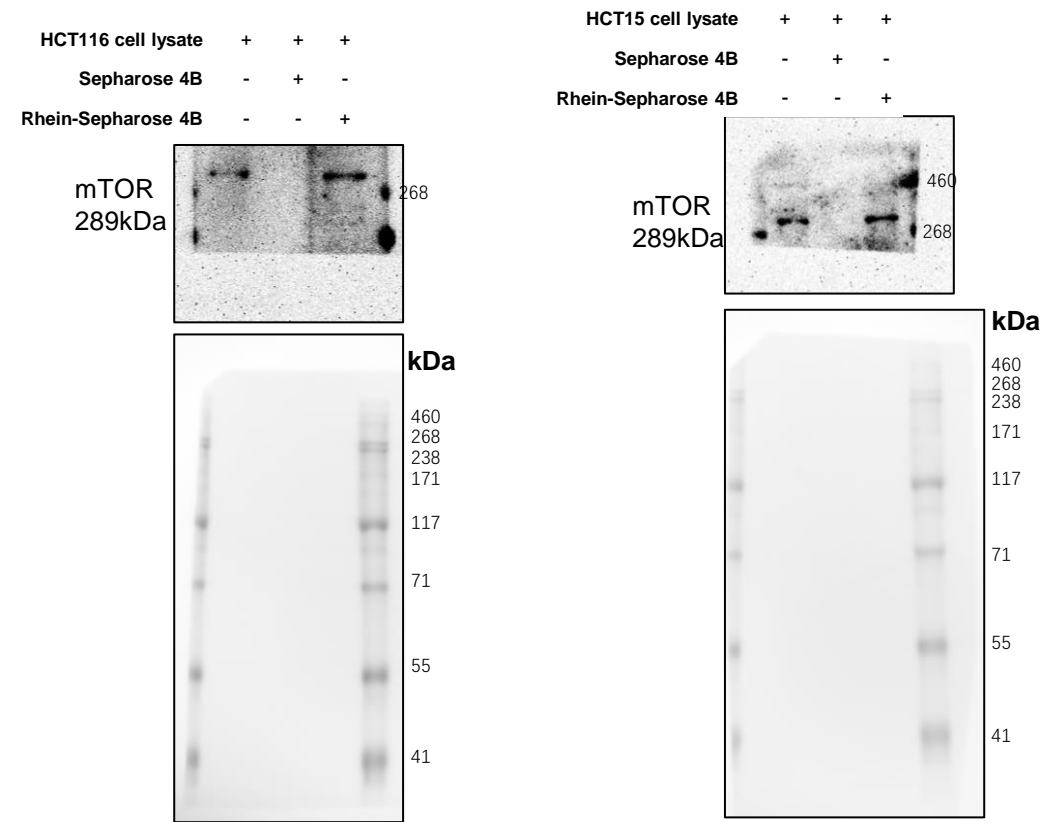

Figure 4D

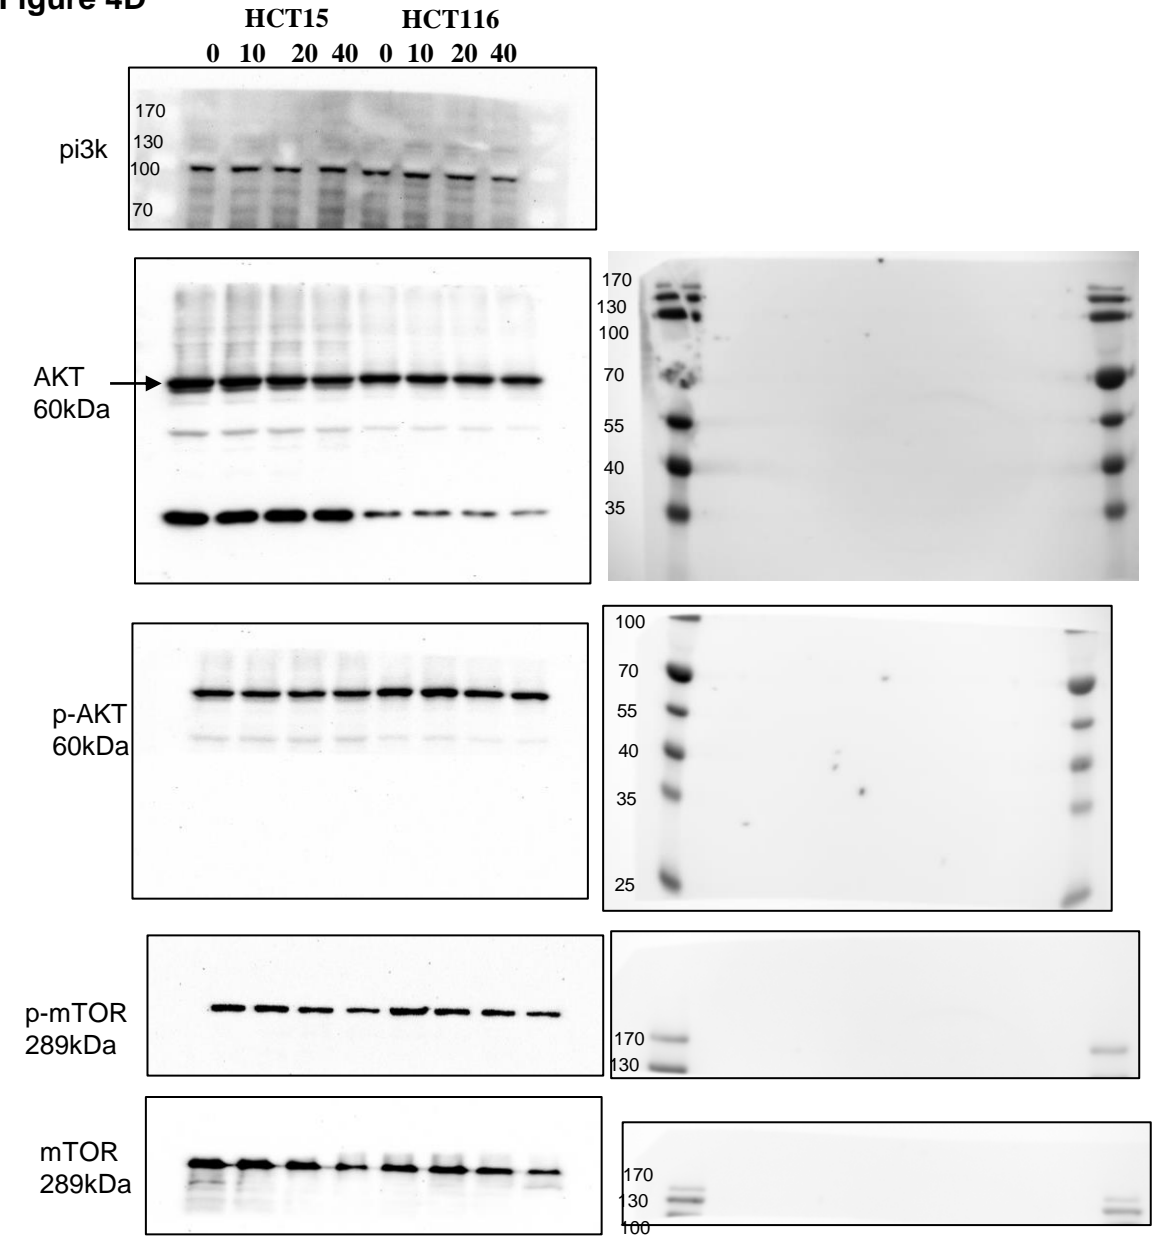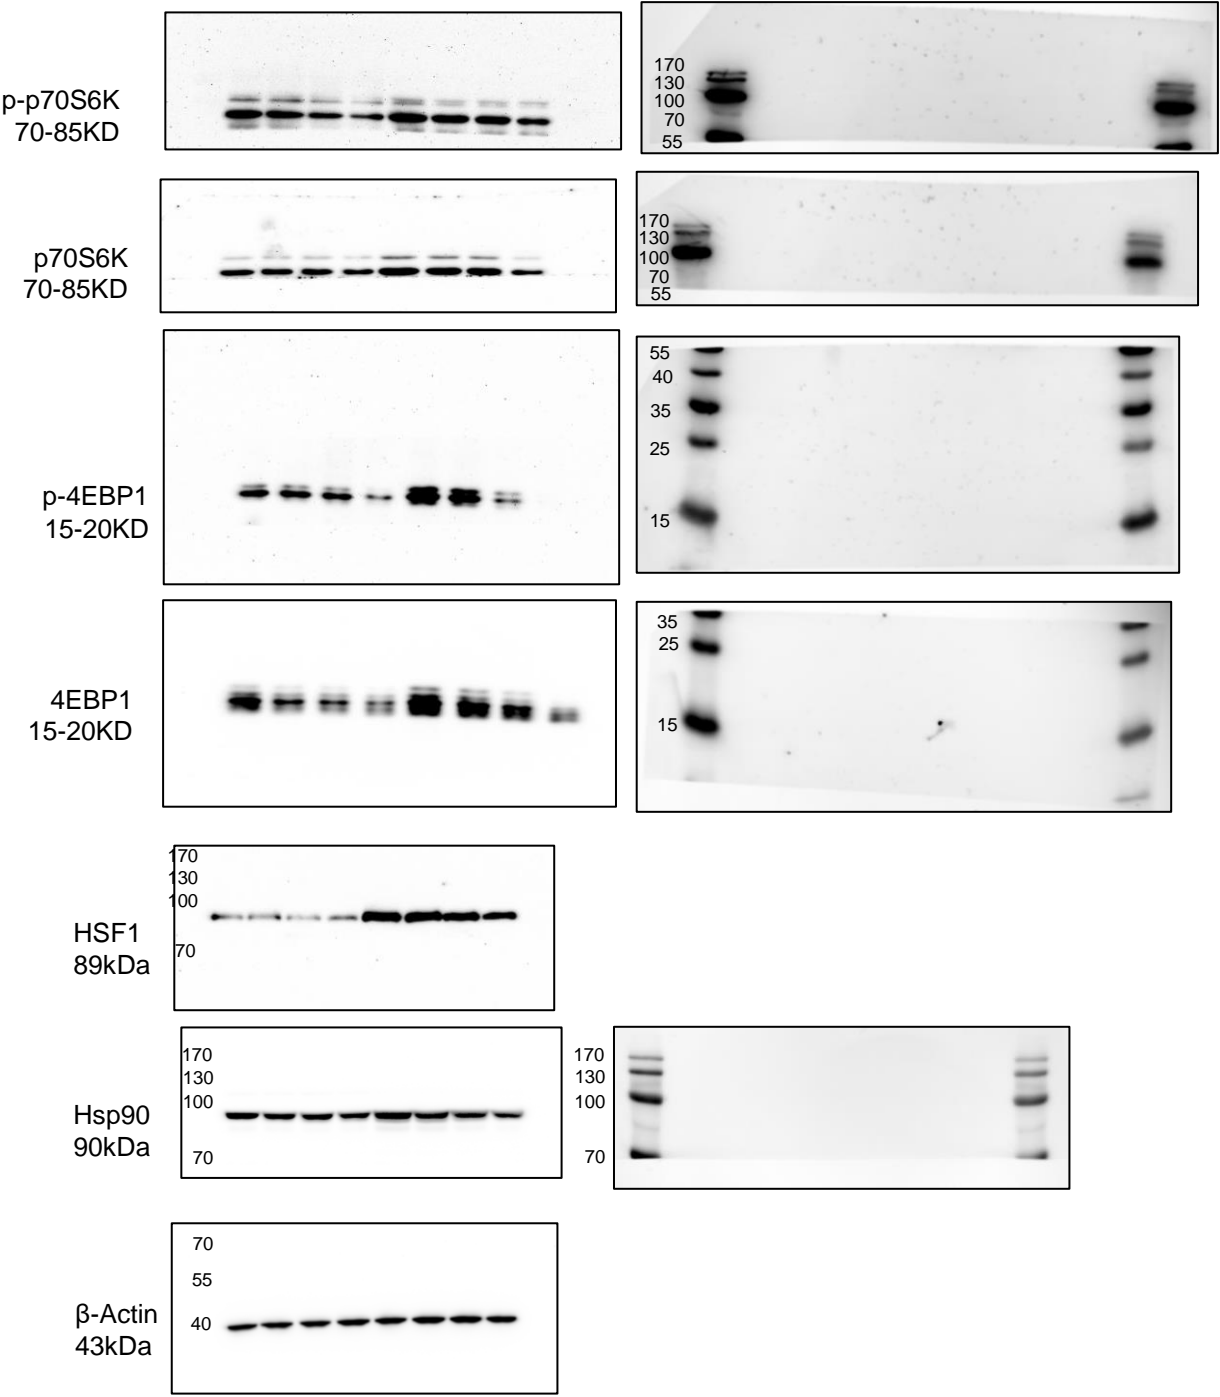

Figure 5A

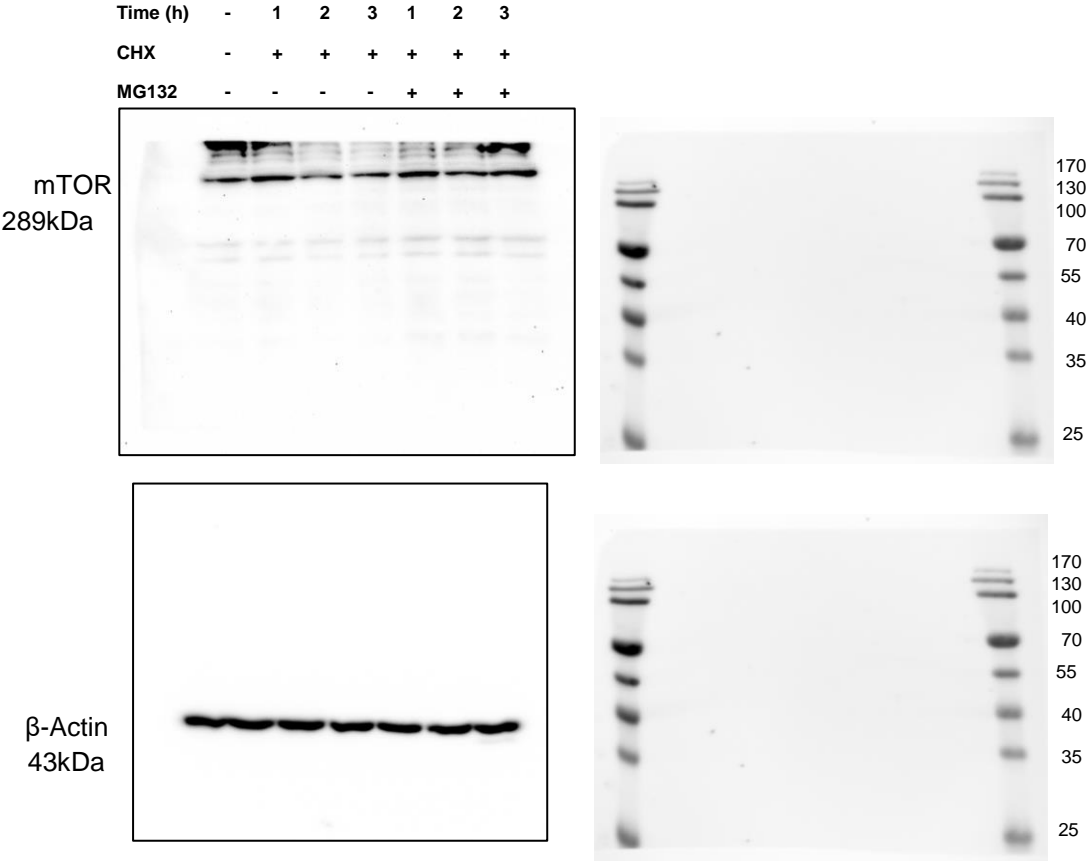

Figure 5B

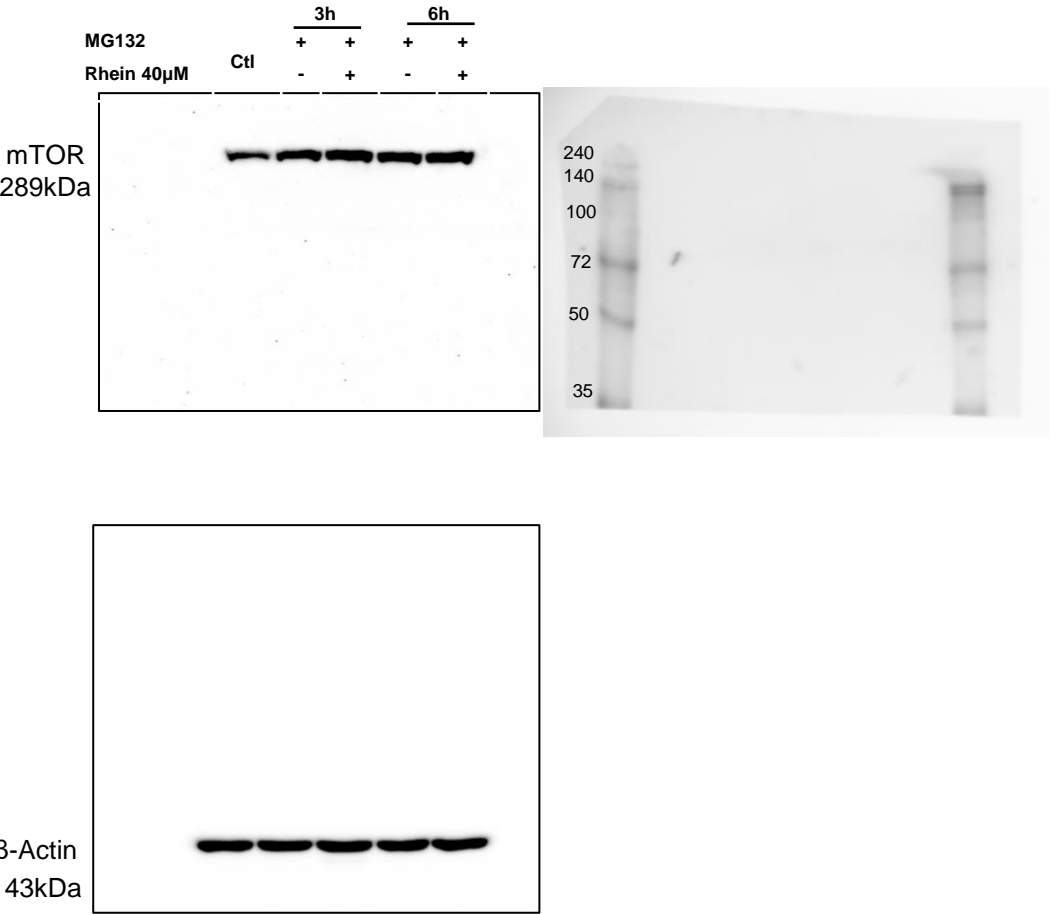

Figure 5C

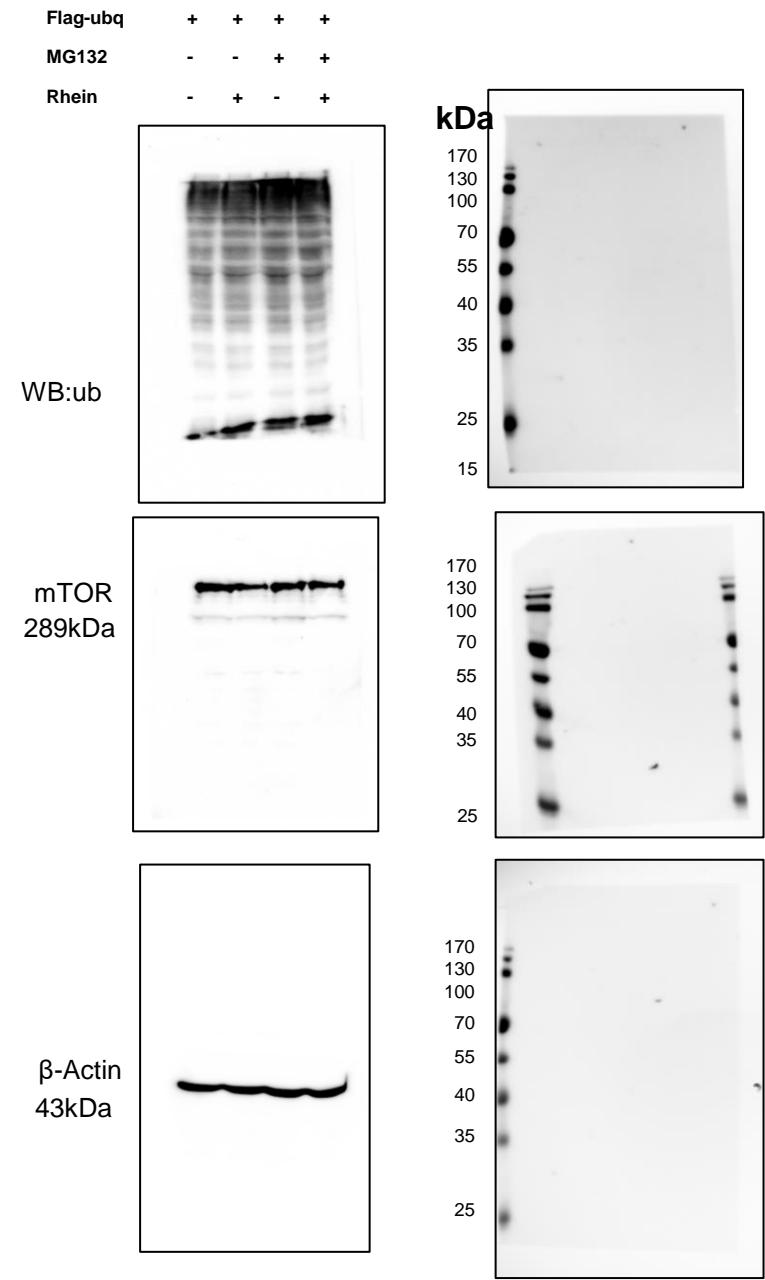

Figure 5D

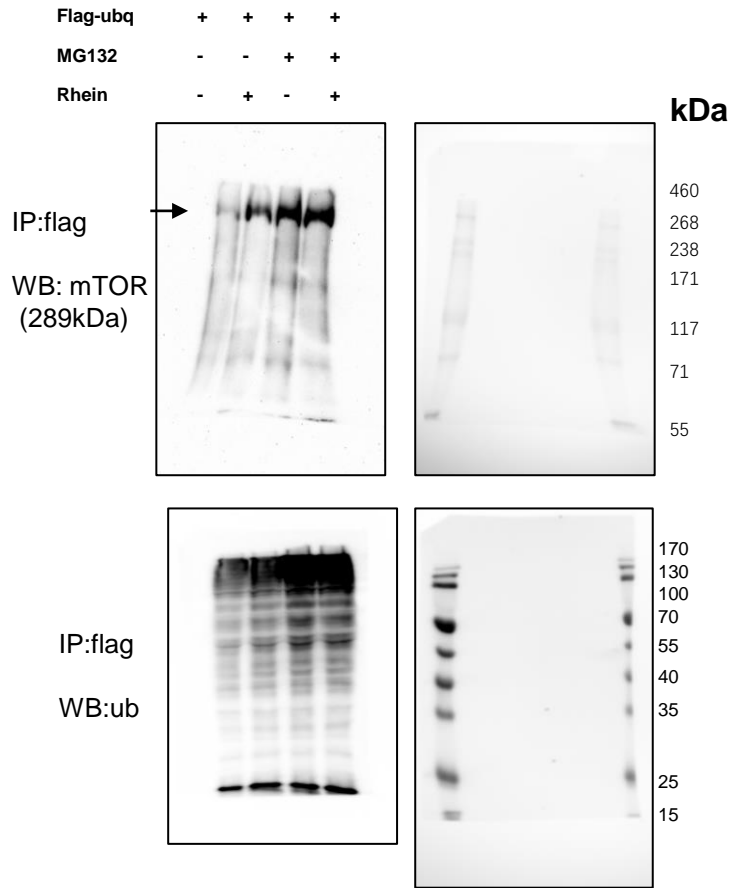

**Figure 6A**

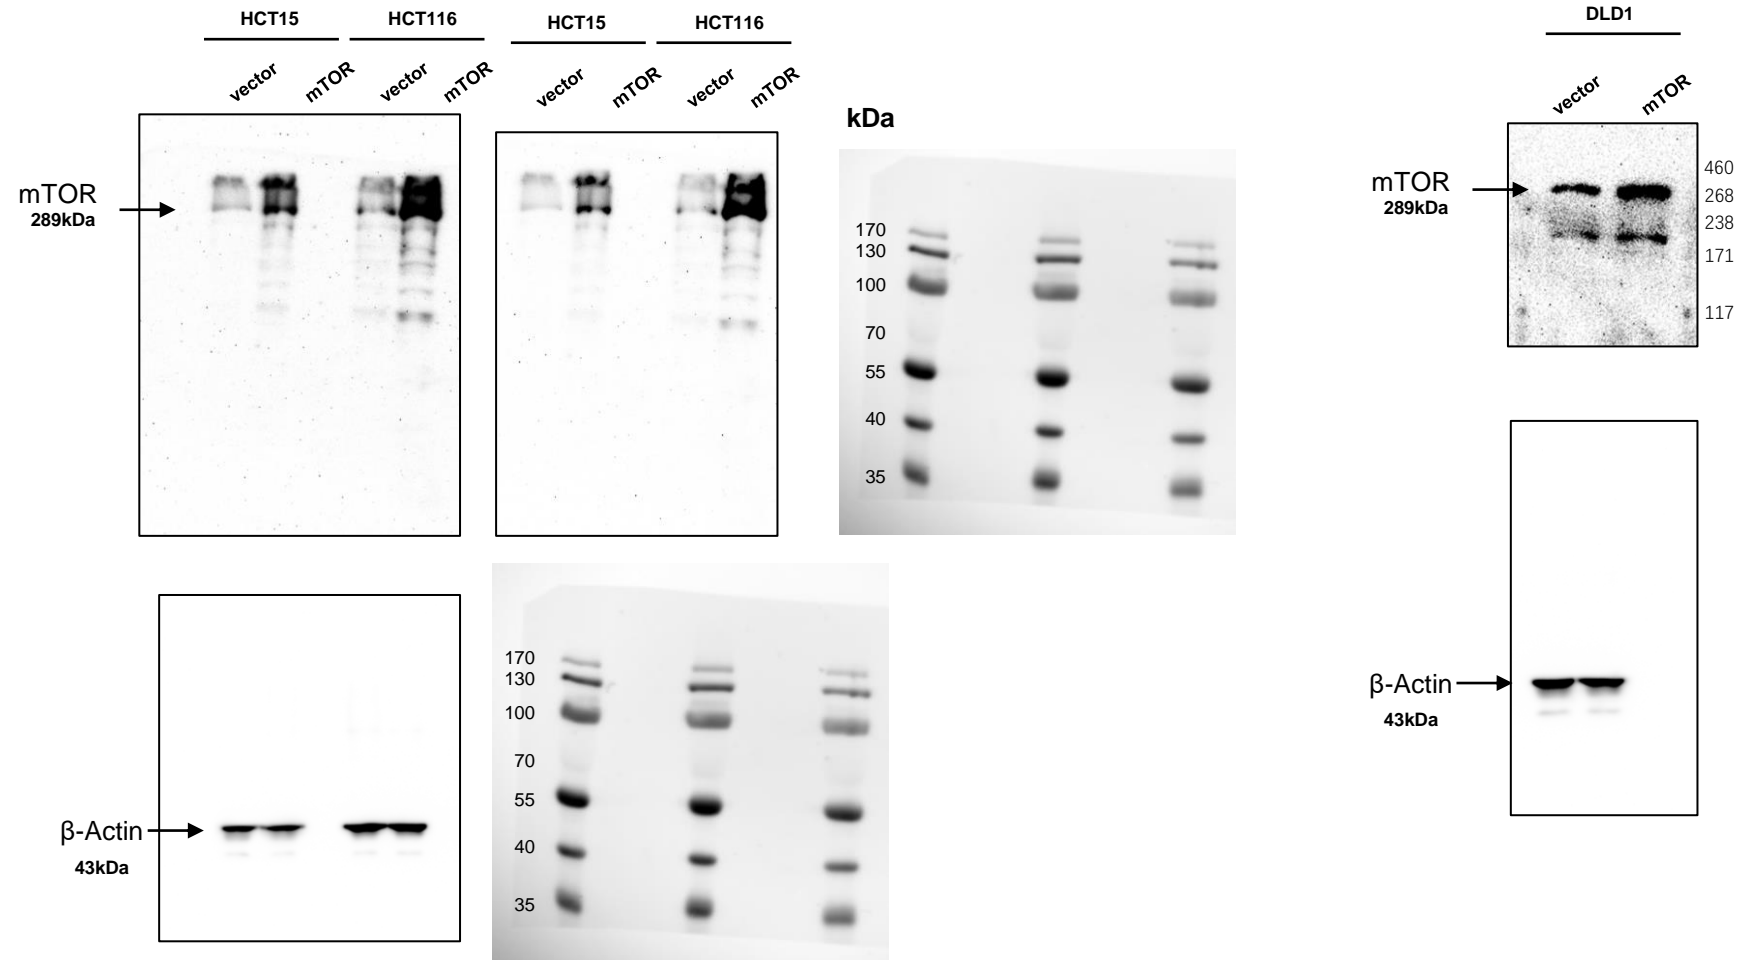



Figure 7A

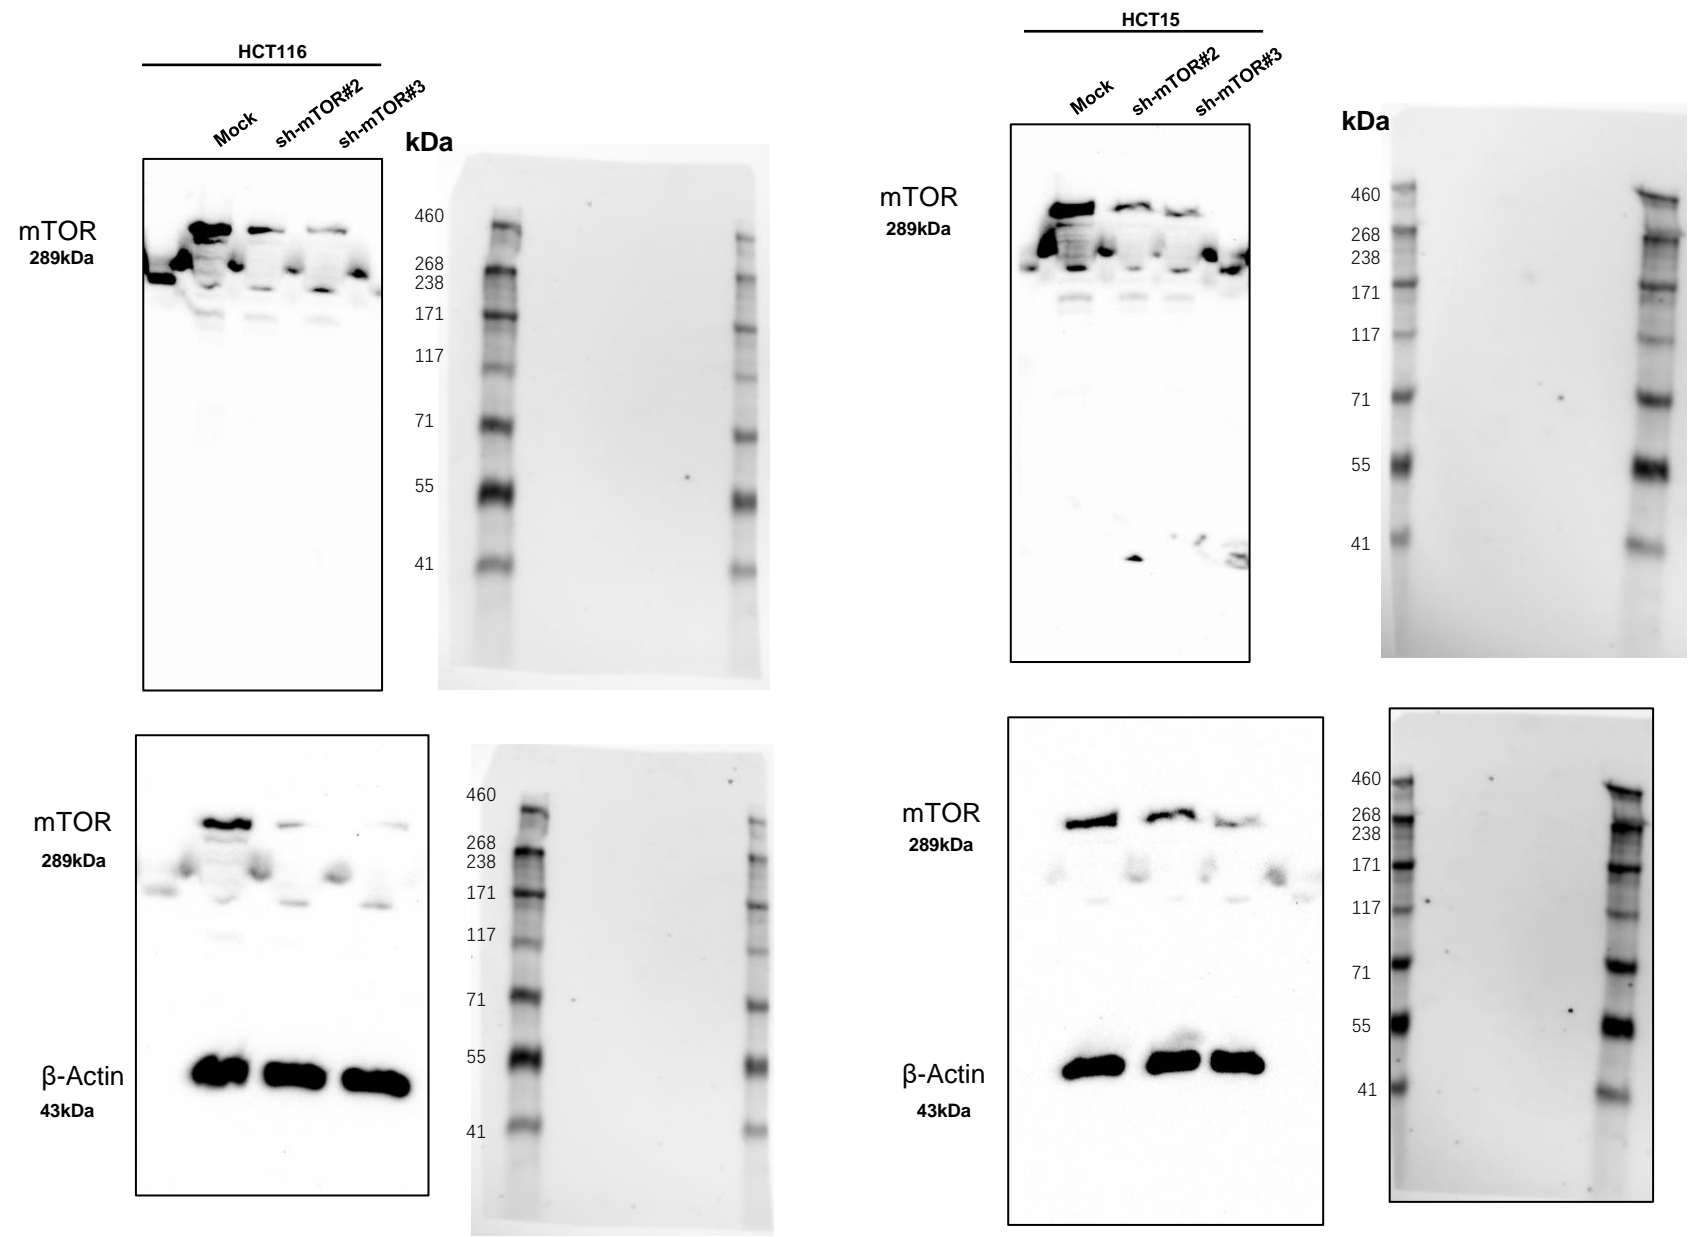

Figure 8F

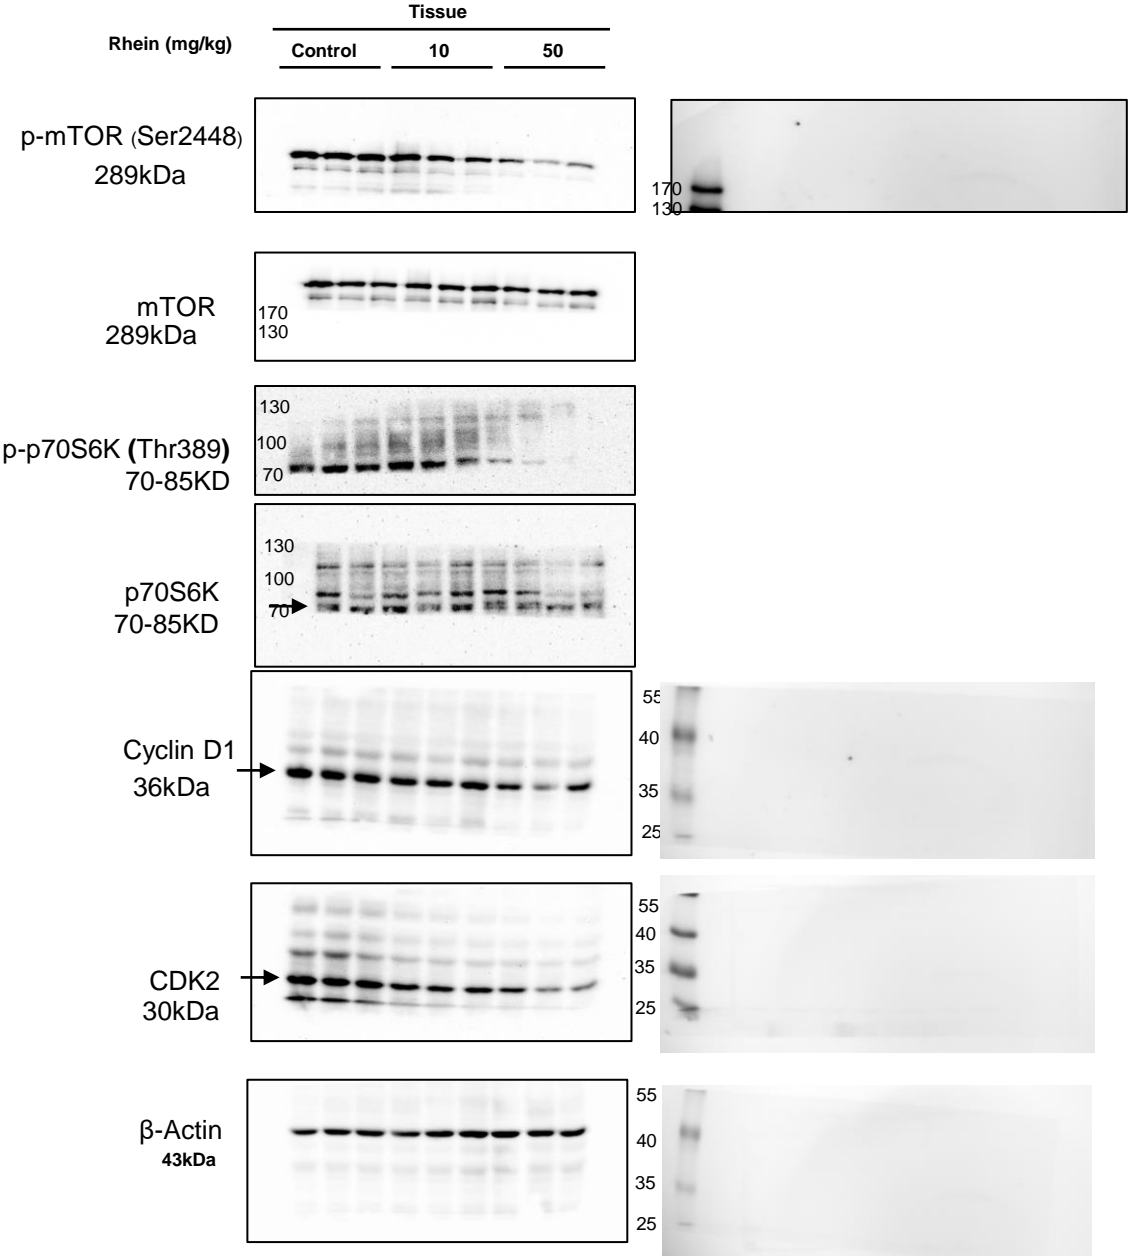

Supplement: s1 [file s1]
