# Supplementary material for: Rhein Suppresses Colorectal Cancer Cell Growth by Inhibiting the mTOR Pathway In Vitro and In Vivo
Source: MDPI journal article supplement (doi:10.3390/cancers13092176), 2021-04-30
Supplement: s1 [file s1]

## Supplementary Figure

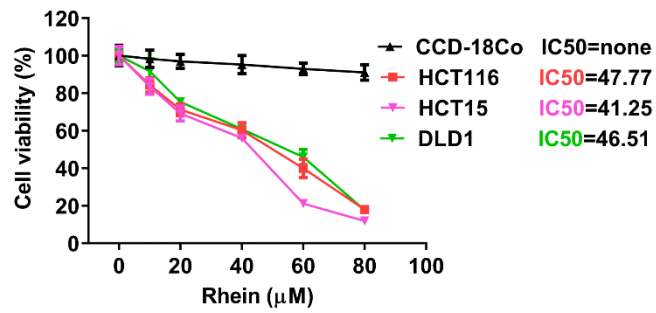

**Figure S1. Effect of rhein on the viability of CRC cells and normal colon fibroblasts cells.**

HCT15, HCT116, DLD1, and CCD-18Co cells were treated with rhein (0, 10, 20, 40, 60, and 80  $\mu\text{M}$ ) for 24 h. Cell viability was determined by CCK-8 assay.
